# Supplementary material for: Predicting the Impact of Vaccination on the Transmission Dynamics of Typhoid in South Asia: A Mathematical Modeling Study
Source: PubMed Central journal article supplement (PMC3886927; doi:10.1371/journal.pntd.0002642), 2014-01-09
Supplement: pntd.0002642.s009.pdf [file pntd.0002642.s009.pdf]

**Table S1.** Sensitivity of estimated parameters to fixed parameter assumptions. The log-likelihood of the best-fit model with the original parameter assumptions is -6,379.

| Fixed parameter                                         | Original value               | New value                      | Estimated parameters                                                                                                                                          | Log-likelihood |
|---------------------------------------------------------|------------------------------|--------------------------------|---------------------------------------------------------------------------------------------------------------------------------------------------------------|----------------|
| Duration of full immunity from infection ( $1/\omega$ ) | 104 weeks                    | 4 weeks                        | $R_{0,p} = 2.46$<br>$R_{0,w} = 0.23$<br>$q = 0.82$<br>$\phi = 18.8$ weeks<br>$\varepsilon = 2.86 \times 10^{-7}$<br>$r = 0.01$<br>$f = 0.0053$                | -6,380         |
| Duration of full immunity from infection ( $1/\omega$ ) | 104 weeks                    | 50 years                       | $R_{0,p} = 1.82$<br>$R_{0,w} = 1.26$<br>$q = 0.19$<br>$\phi = 16.8$ weeks<br>$\varepsilon = 2.49 \times 10^{-6}$<br>$r = 0.01$<br>$f = 0.0052$                | -6,377         |
| Duration of infectiousness ( $1/\delta$ )               | 4 weeks                      | 2 weeks                        | $R_{0,p} = 2.80$<br>$R_{0,w} = 0.17$<br>$q = 0.96$<br>$\phi = 22.5$ weeks<br>$\varepsilon = 4.71 \times 10^{-13}$<br>$r = 0.01$<br>$f = 0.0050$               | -6,388         |
| Duration of infectiousness ( $1/\delta$ )               | 4 weeks                      | 8 weeks                        | $R_{0,p} = 2.67$<br>$R_{0,w} = 4.57 \times 10^{-5}$<br>$q = 0.79$<br>$\phi = 45.9$ weeks<br>$\varepsilon = 1.61 \times 10^{-8}$<br>$r = 0.01$<br>$f = 0.0055$ | -6,389         |
| Fraction infected who become carriers ( $\theta$ )      | 0.003-0.101 depending on age | 0.0003-0.0101 depending on age | $R_{0,p} = 2.23$<br>$R_{0,w} = 0.24$<br>$q = 0.66$<br>$\phi = 15.2$ weeks<br>$\varepsilon = 5.40 \times 10^{-9}$                                              | -6,366         |

|                                                                   |                              |                              |                                                                                                                                                           |        |
|-------------------------------------------------------------------|------------------------------|------------------------------|-----------------------------------------------------------------------------------------------------------------------------------------------------------|--------|
|                                                                   |                              |                              | $r = 0.01$<br>$f = 0.0058$                                                                                                                                |        |
| Fraction infected who become carriers ( $\theta$ )                | 0.003-0.101 depending on age | 0.006-0.202 depending on age | $R_{\theta,p} = 2.85$<br>$R_{\theta,w} = 0.23$<br>$q = 1.00$<br>$\phi = 19.8$ weeks<br>$\varepsilon = 3.14 \times 10^{-11}$<br>$r = 0.01$<br>$f = 0.0050$ | -6,387 |
| Rate of decay of infectious particles from water supply ( $\xi$ ) | $1/3$ week <sup>-1</sup>     | $1$ week <sup>-1</sup>       | $R_{\theta,p} = 2.29$<br>$R_{\theta,w} = 0.48$<br>$q = 0.004$<br>$\phi = 52.5$ weeks<br>$\varepsilon = 7.45 \times 10^{-9}$<br>$r = 0.01$<br>$f = 0.0051$ | -6,395 |
| Rate of decay of infectious particles from water supply ( $\xi$ ) | $1/3$ week <sup>-1</sup>     | $1/9$ week <sup>-1</sup>     | $R_{\theta,p} = 2.77$<br>$R_{\theta,w} = 0.001$<br>$q = 0.014$<br>$\phi = 9.9$ weeks<br>$\varepsilon = 9.69 \times 10^{-9}$<br>$r = 0.01$<br>$f = 0.0053$ | -6,394 |
