# Supplementary material for: Predicting the Impact of Vaccination on the Transmission Dynamics of Typhoid in South Asia: A Mathematical Modeling Study
Source: PubMed Central journal article supplement (PMC3886927; doi:10.1371/journal.pntd.0002642), 2014-01-09
Supplement: pntd.0002642.s010.pdf [file pntd.0002642.s010.pdf]

**Table S2.** Summary of vaccination parameters.

| <b>Parameter</b>                        | <b>Symbol</b> | <b>Value</b>             | <b>Source*</b> |
|-----------------------------------------|---------------|--------------------------|----------------|
| <i>Ty21a</i>                            |               |                          |                |
| Vaccine efficacy at time of inoculation | $v$           | 48%                      | [6]            |
| Duration of vaccine-induced immunity    | $1/\omega_v$  | Same as natural immunity | [5]            |
| <i>ViPS</i>                             |               |                          |                |
| Vaccine efficacy at time of inoculation | $v$           | 80%                      | [6]            |
| Duration of vaccine-induced immunity    | $1/\omega_v$  | 3 years                  | [6]            |
| <i>ViCV</i>                             |               |                          |                |
| Vaccine efficacy at time of inoculation | $v$           | 95.6%                    | [6,8]          |
| Duration of vaccine-induced immunity    | $1/\omega_v$  | 19.2 years               | [9]            |

\*Sources correspond to references in Text S1.
